# Supplementary material for: Flow cytometric-based detection of CD80 is a useful diagnostic marker of acute myeloid leukemia in dogs
Source: Frontiers journal article supplement (doi:10.3389/fvets.2024.1405297), 2024-08-19

**Supplementary Figure 1:** CD80 labeling of non-tumor events in dogs with hematopoietic neoplasia. Representative flow cytometric images of venous blood in one case each of B cell *lymphoma/leukemia* (**A**) and acute myeloid leukemia (AML, **B**). These images are from the same dogs shown in Figure 5. Either neutrophils (**A**) or small cells (**B**) were gated in forward versus side scatter plots (first panel) and then assessed for anti-CD34-phycoerythrin (PE), CD80-allophycocyanin (APC) and major histocompatibility II-fluorescein isothiocyanate (MHCII-FITC) antibody labeling. The respective gates were separated into CD34-negative (CD34<sup>-</sup>) and CD34-positive (CD34<sup>+</sup>) cells using a CD34-PE versus side scatter plot (second panel). Quadrant plots of MHCII-FITC versus CD80-APC were then used to further define the CD34<sup>-</sup> cells, which were the majority of the population (third panel). Neutrophils were CD80<sup>+</sup>/MHCII<sup>-</sup>, as expected, in the dog with B cell *lymphoma/leukemia* (**A**, third panel) and the CD34<sup>-</sup> small cells were largely CD80<sup>-</sup>/MHCII<sup>-</sup> (**B**, third panel), as expected for small lymphocytes. Isotype controls were used to set the quadrant regions (**A** and **B**, fourth panel).

**A: B cell lymphoma/leukemia**

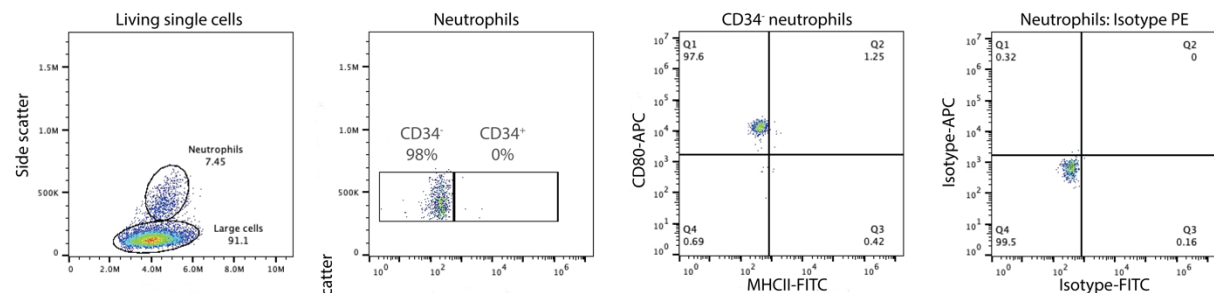

**B: Acute myeloid leukemia**

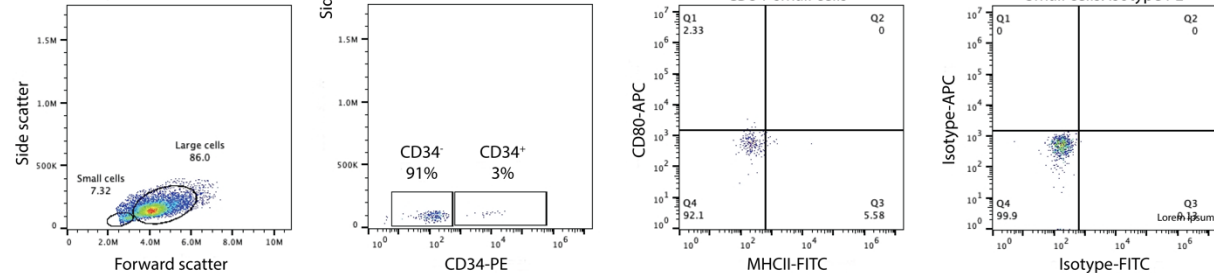

Supplement: Image_1.pdf [file Image_1.pdf]
