# Supplementary material for: Flow cytometric-based detection of CD80 is a useful diagnostic marker of acute myeloid leukemia in dogs
Source: Frontiers journal article supplement (doi:10.3389/fvets.2024.1405297), 2024-08-19
Supplement: Table_1.XLSX [file Table_1.XLSX]

## Sheet: Supplementary Table 1 cyto
Supplemental Table 1: Cytochemical stains used to classify an acute myeloid leukemia, with cells demonstrating positive reactions and expected staining patterns (2,3)
Stain	Positive cells	Expected staining pattern in acute myeloid leukemia*
Alkaline phosphatase (ALP)	Monoblasts, promonocytes, monocytes (+/-), eosinophils (cytoplasm)	Diffuse cytoplasmic stippling, usually >10% of cells
Alpha naphthyl butyrate esterase (ANBE)	Monoblasts (+/-), promonocytes, monocytes, T cells, megakaryocytes, platelets	Diffuse cytoplasmic staining, with or without dark focal or multifocal chunks
Chloroacetate esterase (CAE)	Mature and immature neutrophils, basophils (granules), mast cells (granules), megakaryocytes	Diffuse cytoplasmic staining (may be in focal areas) or large dark cytoplasmic granules
Myeloperoxidase (MPx)	Mature and immature neutrophils (granules), eosinophils (granules), monocytes (+/-)	Granular cytoplasmic staining
Sudan Black B (SBB)	Mature and immature neutrophils (granules), eosinophils (weak, granules), monocytes (+/-)	Granular cytoplasmic staining
* In 3% or more of blasts
+/-: Not all cells are positive

## Sheet: Supplementary Table 2 types
Supplemental Table 2: Subclassification of dogs into subtypes of acute myeloid leukemia, not otherwise specified (14,15), based on differential cell counts in modified Wright's-stained smears, flow cytometric-based antigen expression and cytochemical staining reactions
Subtype	Criteria for classification
Unclassified	<20% immature and mature neutrophils and <20% monocytes in a differential count and <20% CD14+ cells in tumor gate, cytochemical staining not done
Myelomonocytic (AML-M4)	>20% mature and immature neutrophils and >20% monocytes or >20% CAE+ blasts and >20% CD14+ cells in tumor gate or ANBE+ blasts
Monocytic/monoblastic (AML-M5)	>20% monocytes and <20% mature and immature neutrophils or >20% CD14+ cells in tumor gate or >20% ALP+ or ANBE+ blasts with <20% CAE+ blasts
Megakaryoblastic (AML-M7)	Micromegakaryocytes in smears and >20% CD61+ blasts

## Sheet: Supplementary Table 3 B
Supplementary Table 3: Signalment and laboratory results in 37 dogs with T cell neoplasia, in which testing for CD80 expression on tumor cells was performed by flow cytometric analysis
Bolded values in the hemogram: Results outside the reference intervals; In flow cytometry: Results above designated cut-offs for positive cells (CD34, myeloid markers in lymph nodes: >=5%, remaining markers and samples: >=20% for all markers), red values indicate discrepant results between CD21 and CD22 or expression of T cell or myeloid markers					Selected hemogram results											Other cytologic results			Flow cytometric results (percentage positive cells in tumor gate)																Cytochemical staining results (percentage positive blasts)						Other testing
Dog #	Breed	Age	Gender	Diagnosis	Hematocrit	Absolute reticulocyte count*	White blood cell count	Mature neutrophils	Immature neutrophils	Lymphocytes	Monocytes	Blasts	Platelets	Blast percentage		Bone marrow blast percentage	Fluid blast percentage		Source	CD4	CD8	MHCII	CD34	CD3	CD5	CD45	CD21	CD22	CD14	CD80	CD11b	CD11c	CD18		ALP	ANBE	CAE	SBB	MPx		CD3 immunocytochemical staining (percentage positive)	Histology, clonality (PARR)
1	Belgian Tervuren	9	MN	B cell CLL	0.35	111	66.9	8.7	0	57.6	0.7	0	297	0					VB	3	1	100	0	3	4	100	95	94	1	0	0	ND
2	Mixed	7	MN	B cell CLL: Aberrant CD3	0.35	37.1	25.1	6.5	0	18.1	0.5	0	57	0					VB	5	1	99	0	97	8	100	91	89	ND	1	ND	ND
3	Jack Russell	9	MN	B cell CLL: Aberrant CD3	0.29	120	149.8	3	0	146.8	0	0	23	0					VB	0	0	99	0	78	1	99	96	88	0	0	0	0
4	Yorkshire Terrier	8	FS	B cell CLL: Aberrant CD3	0.19	51	79.5	12.7	2.4	60.4	4	0	114	0					VB	1	1	97	0	26	1	99	53	75	1	0	0	2	1		0	99	0	0	0
5	Bichon Frise	10	FS	B cell CLL: Aberrant CD5	0.34	165.4	85	11.9	1.7	65.4	2.6	2.6	129	3.05882					VB	2	5	99	4	0	25	100	87	91	0	0	0	0
6	Mixed	3	MN	B cell lymphoma/leukemia	A hemogram was not done											>25			BM	0	3	67	0	0	0	65	0	43	20	17	0	9									0	B clonal population in marrow, CD20+ and CD3- on immunocytochemical staining of bone marrow
7	German Shepherd	9	MN	B cell lymphoma/leukemia	0.18	113	47.9	2.395	0.479	0.479	2.395	42.152	65	88					LN	4	0	99	2	0	5	100	90	91	3	0	0	0
8	Mixed	11	FS	B cell lymphoma/leukemia	0.38	38.7	24.4	8.5	1.7	7.8	0.2	6.1	42	25					LN	3	0	99	0	5	5	99	78	94	5	0	1	ND
9	Mixed	13	FS	B cell lymphoma/leukemia	0.45		63	3.2	0	4.4	0.6	54.2	234	86.0317					VB	0	0	99.26	31.29	0	0	99.24	80.94	92.98	0	0	0	0
10	Golden Retriever	9	MN	B cell lymphoma/leukemia	0.34	12	12.5	3.3	0	0.9	0.4	8	54	64		47			BM	4	6	95	1	10	9	97	78	82	4	5	1	10	4		0	0	0	0	0
11	Shih Tzu	11	MN	B cell lymphoma/leukemia	0.28	ND	140.6	15.5	1.4	0	1.4	122.3	191	86.9844					VB	1	0	9	1	1	1	99	97	97	1	2	1	1	1		0	0	ND	0	0
12	Mixed	3	F	B cell lymphoma/leukemia	0.6	76.4	11.9	10.7	0.1	0.8	0.2	0	295	0					LN	8	3	98	0	12	10	100	80	87	ND	1	ND	ND
13	Mixed	9	FS	B cell lymphoma/leukemia	0.3	149.3	21.6	16.9	2.2	1.1	0.9	0.4	136	1.85185					LN	6	2	92	0	4	6	96	83	83	ND	3	ND	ND
14	Golden Retriever	4	FS	B cell lymphoma/leukemia	0.5	56.8	21.4	12.8	0	3.9	1.3	0.6	293	2.80374					LN	4	1	97	1	3	3	100	90	93	ND	3	ND	ND
15	Mixed	13	FS	B cell lymphoma/leukemia	0.47	53.2	9.7	7	0	2	0.7	0	160	0					LN	6	8	95	0	1	7	98	69	85	ND	3	ND	ND
16	Australian Shepherd	9	FS	B cell lymphoma/leukemia	0.44	106.6	5.9	5.1	0.1	0.3	0.3	0	86	0					LN	2	1	98	1	5	6	100	96	97	ND	2	ND	ND
17	German Shepherd	4	MN	B cell lymphoma/leukemia	0.46		16.8	15.1	0	1	0.5	0	143	0					LN	2	0	98	0	1	2	100	97	98	ND	0	ND	ND
18	Australian Shepherd	12	MN	B cell lymphoma/leukemia	0.39	73.7	10	5.9	0.1	3	0.7	0.3	30	3					LN	3	2	93	0	5	5	100	82	93	ND	1	ND	ND
19	Mixed	2	MN	B cell lymphoma/leukemia	A hemogram was not done												>80		PLF	0	0	0	0	0	0	96	0	21	0	0	0	47 w
20	Mixed	7	MN	B cell lymphoma/leukemia	0.42		10.1	9.3	0.1	0.3	0.2	0.2	96	1.9802					LN	3	1	92	0	2	3	100	80	82	ND	2	ND	ND
21	Mixed	7	MN	B cell lymphoma/leukemia	0.41		9.9	5.1	0	4.4	0.2	0	336	0					LN	4	2	99	0	6	7	100	92	95	ND	1	ND	ND
22	German Shepherd	6	MN	B cell lymphoma/leukemia	0.53		13.9	10.3	0	2.2	0.8	0	318	0					LN	9	1	96	0	1	9	99	78	71	ND	0	ND	ND
23	Mixed	7	FS	B cell lymphoma/leukemia	0.33	89.4	6.4	4.7	0	0.8	0.6	0	151	0					LN	8	6	99	0	6	16	100	87	85	ND	1	ND	ND
24	Rottweiler	8	FS	B cell lymphoma/leukemia	0.36	42.5	8.8	6.2	0	1.6	0.9	0	284	0					LN	24	7	94	0	23	31	100	68	67	ND	2	ND	ND
25	Mixed	8	FS	B cell lymphoma/leukemia	0.38	72	8.4	5.6	0	1.3	0.6	0.8	67	9.52381					LN	0	0	99	0	0	0	99	98	0	0	0	0	0
26	English Springer Spaniel	7	MN	B cell lymphoma/leukemia	0.48		9.7	7.3	0	1.3	0.8	0	309	0					LN	7	3	99	0	12	7	100	91	98	ND	0	ND	ND
27	Mixed	11	FS	B cell lymphoma/leukemia: Aberrant CD3	0.48		8.6	6.8	0	1.3	0.3	0	267	0					LN	0	1	98	0	88	1	100	100	100	ND	0	ND	ND
28	Mixed	11	FS	B cell lymphoma/leukemia: Aberrant CD3	0.42		7.6	5.7	0	1.3	0.3	0	291	0					LN	2	1	100	0	94	10	100	99	98	ND	1	ND	ND
29	Vizsla	11	FS	B cell lymphoma/leukemia: CD34+	0.48		7.6	5.8	0	1.1	0.5	0	198	0					LN	2	1	99	35	0	2	100	97	98	ND	1	ND	ND
30	German Shepherd	8	FS	B cell lymphoma/leukemia: CD34+	0.48		13.4	11.5	0.3	0.8	0.5	0	127	0					LN	1	0	100	87	3	1	100	97	98	ND	1	ND	ND
31	German Shepherd	6	M	B cell lymphoma/leukemia: CD34+	0.5		20.4	17.5	0.2	1.2	1.2	0	190	0					LN	3	1	98	33	2	4	99	92	92	ND	0	ND	ND
32	Golden Retriever	6	FS	B cell lymphoma/leukemia: CD34+	0.46		8.7	4.1	0.1	2.4	0.3	1.7	204	19.5402					LN	0	0	100	5	0	0	100	99	97	0	0	0	0										Lymph node histology: High grade lymphoma
33	Rottweiler	3	MN	B cell lymphoma/leukemia: CD34+	0.46		5.5	3.8	0	1.2	0.3	0	190	0					LN	1.98	2.02	98.78	77.61	1	0.99	99.83	98.42	98.81	0	0.07	0	0
34	Mixed	12	FS	B cell lymphoma/leukemia: CD34+	0.36	108	7.5	6	0	1	0.4	0	421	0					LN	0	0	99.11	64.51	0	0	99.24	97.3	98.96	ND	0	ND	ND
35	Bernese mountain dog	5	F	B cell lymphoma/leukemia: CD34+, aberrant CD3	0.38	23	12.3	11.1	0.6	0.5	0.1	0	137	0					LN	1	0	99	22	98	16	100	97	99	0	1	0	0
36	Mixed	4	FS	B cell lymphoma/leukemia: CD34+, aberrant CD3	0.4	115.3	6.2	5	0	0.7	0.4	0.1	112	1.6129					LN	1	1	100	42	80	2	100	97	98	ND	1	ND	ND
37	Mixed	6	M	B cell lymphoma/leukemia: CD34+, aberrant CD5	0.38	95.4	14.1	11.3	0	1	1.3	0	272	0					LN	2	1	100	44	0	75	100	95	98	ND	2	ND	ND
	Median age	8		Reference interval	0.41-0.58	11-92	5.7-14.2	2.7-9.4	0-0.1	0.9-4.7	0.1-1.3	0	186-545							Residual cells	Residual cells			Residual cells	Residual cells				Residual cells	Residual cells
				Units	L/L	x 10^9/L	x 10^9/L	x 10^9/L	x 10^9/L	x 10^9/L	x 10^9/L	x 10^9/L	x 10^9/L	%																					ALP: Alkaline phosphatase
						ND: Not done													Positive	0								Positive	0	0	0	1	0		ANBE: Alpha-naphthyl butyrate esterase
						* Only done in anemic animals													Number	37								Number	15	37	15	13	3		CAE: Chloroacetate esterase
																			%	0								%	0	0	0	0.0769231	0		MPx: Myeloperoxidase
																			W: Weak expression (overlap with isotype control)																SBB: Sudan Black B
																			ND: Not done

## Sheet: Supplementary Table 4  T
Supplementary Table 4: Signalment and laboratory results in 36 dogs with T cell neoplasia, in which testing for CD80 expression on tumor cells was performed with flow cytometric analysis
Bolded values in the hemogram: Results outside the reference intervals; In flow cytometry: Results above designated cut-offs for positive cells (CD34, myeloid markers in lymph nodes: >=5%, remaining markers and samples: >=20% for all markers), red values indicate discrepant results between CD3 and CD5 or expression of B cell or myeloid markers					Selected hemogram results											Other cytologic results			Flow cytometric results (percentage positive cells in tumor gate)																	Cytochemical staining results (percentage positive blasts)						Other tests
Dog #	Breed	Age	Gender	Diagnosis	Hematocrit	Absolute reticulocyte count*	White blood cell count	Mature neutrophils	Immature neutrophils	Lymphocytes	Monocytes	Blasts	Platelets	Blast percentage		Bone marrow blast percentage	Fluid blast percentage		Source	CD4	CD8	MHCII	CD34	CD3	CD5	CD45	CD21	CD22	CD14	CD80	CD11b	CD11c	CD18	Other antibodies		ALP	ANBE	CAE	SBB	MPx		CD3 immunocytochemical staining (percentage positive)	Histology, clonality (PARR)
1	Basset Hound	10	FS	T cell GL CLL: CD8	0.38	114	116.8	23.4	1.2	85.3	4.7	0	153	0					VB	3	92	99	0	75	93	100	0	0	7	7	7	98	ND
2	Golden Retriever	9	FS	T cell GL CLL: CD8	0.52		95.4	2.9	0	89.7	1.9	0	325	0					VB	0	98.88	99.9	0	99.49	99.08	99.66	0	0	0	0	0	0	ND
3	Mixed	5	MN	T cell lymphoma/leukemia: CD4	0.57		7.9	4.1	0.1	0.9	0.8	0	36	0		>70			BM	94	0	10	0	97	89	97	0	0	0	0	0	0	ND									100
4	Golden Retriever	4	MN	T cell lymphoma/leukemia: CD4	0.52		5.4	1.6	0	3.2	0.5	0	50	0		>80			BM	94.08	1	0	8.38	83.17	93.55	98.01	0.65	0.32	1.44	2.28	3.87	5.44	ND
5	Pug	8	MN	T cell lymphoma/leukemia: CD4	0.45		9.3	6.2	0.2	1.3	1.5	0	126	0					LN	95	1	6	0	97	7	100	3	1	ND	0	ND	ND	ND
6	Bloodhound	5	M	T cell lymphoma/leukemia: CD4	0.57		12	9.6	0.1	0.8	1.4	0	249	0					Mediastinal mass	94	1	8	0	94	93	98	0	0	ND	9	ND	ND	ND
7	Boxer	6	FS	T cell lymphoma/leukemia: CD4	0.37	102.7	4.3	2.9	0.2	0.7	0.5	0	69	0					LN	96	0	50	0	97	98	100	1	2	ND	0	ND	ND	ND
8	German Shepherd	5	M	T cell lymphoma/leukemia: CD4	0.54		13	10.9	0.1	1	0.9	0	203	0					LN	93	3	20	0	93	93	100	3	1	ND	1	ND	ND	ND
9	Labrador Retriever	6	MN	T cell lymphoma/leukemia: CD4	0.52		9.7	7.2	0	1.6	0.9	0	83	0					LN	97	1	3	0	99	97	99	1	0	ND	1	ND	ND	ND
10	Golden Retriever	6	MN	T cell lymphoma/leukemia: CD4	0.5		12.1	10.5	0	0.4	1.2	0	196	0					LN	78	3	22	7	80	15	100	5	4	ND	0	ND	ND	ND
11	Mixed	11	FS	T cell lymphoma/leukemia: CD4	0.13	5	12.6	4.4	0.6	4.4	0.6	2.5	15	19.8413					VB	91	19	12	0	92	15	98	0	0	4	0	0	0	ND
12*	Golden retriever	11	FS	T cell lymphoma/leukemia: CD8	0.56		19.7	4.9	0	14.2	0.4	0	339	0					VB	5	42	98	4	0	57	31	0	0	1	0	0	0	ND
13	Bernese Mountain Dog	6	FS	T cell lymphoma/leukemia: CD8	0.32	118	40.7	18.3	0	2	2.4	17.5	473	42.9975					VB	15	72.86	89.49	0	19.6	77.75	99.93	0	30.34	20.99	24.78	23.36	59.32	ND
14	Giant Schnauzer	8	FS	T cell lymphoma/leukemia: CD8	0.34	ND	79.7	17.5	4.8	3.2	9.6	44.6	53	55.9598					VB	4	36 w	93	0	1	87	99	0	0	6	10	1	1	1			0	100	0	0	0		100
15	Doberman	4	MN	T cell lymphoma/leukemia: CD8	0.49		144	20.2	0	0	11.5	112.3	45	77.9861					VB	9	30 w	80 w	0	2	80 w	100	0	0	4	6	7	ND	ND			0	81	0	0	0		36
16	Shih Tzu	6	MN	T cell lymphoma/leukemia: CD8	0.35	ND	24.7	5.434	1.482	6.916	1.729	9.139	28	37					VB	7	84	95	0	87	86	99	1	1	11	10	1	0	ND
17	Mixed	11	MN	T cell lymphoma/leukemia: CD8	0.34	121.9	34.3	27.4	0	0.3	6.5	0	434	0			>90		PLF	0	71	97	0	0	0	100	0	0	0	0	63	32	ND	TCRab+
18	Mixed	6	F	T cell lymphoma/leukemia: CD8	0.4	132.4	8	5.2	0.2	1.8	0.6	0	239	0					LN	10	87	56	1	97	65	93	1	2	ND	1	ND	ND	ND
19	Mixed	14	MN	T cell lymphoma/leukemia: CD8	0.4	76.3	28.1	13.8	0	9.8	3.1	0	345	0					LN	2	94	99	0	82	96	100	1	0	ND	0	ND	ND	ND
20	Australian Shepherd	1	M	T cell lymphoma/leukemia: Double positive	0.55		5.7	3.5	0	1.5	0.2	0	230	0					LN	97	97	0	0	26	96	97	0	0	ND	0	ND	ND	ND										Post-mortem histopathology: Lung and tracheobronchial lymph node lymphoma: CD3+ on immunohistochemical staining
21	Mixed	13	FS	T cell lymphoma/leukemia: Double positive	0.34	39	476.5	57.18	4.765	0	28.59	385.965	90	81					VB	98	98	0	0	97	98	7	0	0	0	0	0	0	ND										Histopathology: Anaplastic T cell lymphoma in a laryngeal mass: CD3+, CD30+ on immunohistochemical staining of a biopsy
22	Labrador Retriever	5	MN	T cell lymphoma/leukemia: Double negative	0.22	14	52.1	1	0	2.1	0	49	24	94.0499					VB	1	1	3	84	63	97	100	1	1	0	0	1	1	ND			100	0	0	0	0		24
23	Golden Retriever	4	FS	T cell lymphoma/leukemia: Double negative	0.49		93.6	27.1	0.9	2.8	2.8	60	43	64.1026					VB	1	0	2	0	97	98	100	0	0	2	1	1	1	ND			0	98	0	0	0		94
24	German Shepherd	9	MN	T cell lymphoma/leukemia: Double negative	0.19	ND	598.7	65.9	0	0	0	532.8	37	88.9928					VB	1	0	1	95	1	0	99	0	2	2	2	1	2	1			0	96	0	0	0		77
25	Mixed	2	MN	T cell lymphoma/leukemia: Double negative	0.38	47	343.8	6.9	0	0	0	336.9	<30	97.993					VB	0	0	77 w	0	99	99	100	0	0	0	0	0	75 w	ND
26	English Bulldog	2	MN	T cell lymphoma/leukemia: Double negative	0.5		37.8	11.3	0.4	0	0.4	25.7	74	67.9894					VB	3.04	10	17.19	3.12	88.56	94.19	99.64	1.87	3.31	0.49	1.11	17.4	2.11	ND
27	Golden Retriever	0.75	M	T cell lymphoma/leukemia: Double negative	0.55		58.2	16.9	5.8	0.6	1.2	33.8	74	58.0756					VB	5	1	93	0	79	2	100	2	2	5	5	5	ND	ND			0	56	0	0	0
28	Mixed	7	MN	T cell lymphoma/leukemia: Double negative	0.17	28.5	73.9	45.1	1.5	1.5	0.7	25.1	99	33.9648					VB	0	0	11	0	95	94	99	0	0	0	0	9	99	ND
29	Mixed	5	FS	T cell lymphoma/leukemia: Double negative	0.43		15.9	14.5	9.2	1.1	9.2	0	249	0			86		PLF	7	0	92	0	90	92	100	0	1	2	3	3	ND	ND
30	Mi-Ki	11	MN	T cell lymphoma/leukemia: Double negative	A hemogram was not done												>90		PTF	0	0	46	0	30	98	100	0	0	0	0	0	0	ND
31	Labrador Retriever	5	M	T cell lymphoma/leukemia: Double negative	0.33	127	15.9	13	0	0.8	2.1	0	341	0					LN	1	0	51	0	87	54	100	0	0	ND	3	ND	ND	ND										Clonal T
32	Staffordshire Bull Terrier	7	FS	T cell lymphoma/leukemia: Double negative	0.47		9.4	7.3	0	1.3	0.6	0	237	0					Lung mass	10	11	75	1	70	11	98	2	2	ND	14	ND	ND	ND
33	American Bulldog	3	MN	T cell lymphoma/leukemia: Double negative	0.23	173.5	5.9	4.1	0.1	0.9	0.7	0	24	0					LN	1.28	3.82	2	44	5.93	79.8	99.36	0.41	1.61	0.55	1.01	5.28	13	ND
34	Shih Tzu	13	MN	T zone lymphoma: CD4	0.32	85	75.3	23.3	0.8	48.9	2.3	0	275	0					VB	88	2	93	0	41	85	12	0	0	ND	11	ND	ND	ND
35	Bull Mastiff	7	MN	T zone lymphoma: Double negative	0.56		9.2	4.8	0	4	0.4	0	155	0					LN	9	6	96	0	87	85	31	9	15	ND	0	ND	ND	ND
	Median age	6		Reference interval	0.41-0.58	11-92	5.7-14.2	2.7-9.4	0-0.1	0.9-4.7	0.1-1.3	0	186-545						W: Weak expression (overlap with isotype control)										Residual cells	Residual cells	Residual cells	Residual cells				ALP: Alkaline phosphatase
				Units	L/L	x 10^9/L	x 10^9/L	x 10^9/L	x 10^9/L	x 10^9/L	x 10^9/L	x 10^9/L	x 10^9/L	%					ND: Not done									Positive	0	0	2	6	0			ANBE: Alpha-naphthyl butyrate esterase
* This dog had 5.5 x 10^9/L granular lymphocytes with an average of 39% granular lymphocytes in bone marrow. There was a concurrent T zone lymphocytosis (8.7 x 10^9/L CD45- lymphocytes). Both types of lymphocytosis were persistent (present for 2 months), after which the dog was lost to follow up.						ND: Not done																						Number	22	35	22	19	2			CAE: Chloroacetate esterase
						* Only done in anemic animals																						%	0	0	0.0909091	0.315789	0			MPx: Myeloperoxidase
																																				SBB: Sudan Black B

## Sheet: Supplementary Table 5 AML
Supplementary Table 5: Signalment and laboratory results in 37 dogs with acute myeloid leukemia (AML), in which testing for CD80 expression on tumor cells was performed with flow cytometric analysis. Dogs were subclassified into categories of AML based on the differential cell count in the analyzed tissue, flow cytometric and cytochemical staining results (see Supplementary Table 2). The term cyt…
Bolded values in the hemogram: Results outside the reference intervals; In flow cytometry: Results above designated cut-offs for positive cells (CD34, myeloid markers in lymph nodes: >=5%, remaining markers and samples: >=20% for all markers)
						Hemogram results											Other cytologic results			Flow cytometric results (percentage positive cells in tumor gate)																	Cytochemical staining results (percentage positive blasts)						Other testing
Dog	Breed	Age	Gender	Date	Diagnosis	Hematocrit	Absolute reticulocyte count*	White blood cell count	Mature neutrophils	Immature neutrophils	Lymphocytes	Monocytes	Blasts	Platelets	Blast percentage		Bone marrow blast percentage	Lymph node/fluid blast percentage		Source	CD4	CD8	MHCII	CD34	CD3	CD5	CD45	CD21	CD22	CD14	CD80	CD11b	CD11c	CD18	Other antibodies		ALP	ANBE	CAE	SBB	MPx		CD3 immunocytochemical staining (percentage positive)	Histology, clonality
1	Mixed	8	MN	2020-03-03	Acute myeloid leukemia: Unclassified	0.37	12	72.6	5.1	0	2.2	0	65.4	39	90.0826					VB	96	1	2	33	2	11	99	1	1	1	2	15	3	ND			ND	ND	ND	ND	ND
2	German Shepherd	9	MN	2015-05-10	Acute myeloid leukemia: M4	0.26	13	25.4	10.7	2.5	0.5	0	9.4	16	37.0079					VB	92	0	2	98	0	1	100	1	1	1	2	89	0	ND			100	100	0	ND	ND
3	German Shepherd	5	FS	2016-02-16	Acute myeloid leukemia: M4	0.36	80	45.2	4.1	0	17.6	0	22.5	14	49.7788					VB	0	2	0	85	0	17	100	0	0	0	0	1	23	ND			100	4	84	ND	0
4	Bulldog	2	M	2018-06-02	Acute myeloid leukemia: M4	0.21	10	15.6	3.3	1.9	2.3	0.3	7.5	213	48.0769		94			BM	21	0	6	59	0	0	99	0	0	0	0	0	0	ND			96	96	18	ND	ND
5	Golden Retriever	12	MN	2022-09-12	Acute myeloid leukemia: M4	0.45		43.8	1.8	0.9	2.2	0.4	38.5	28	87.8995		89			BM	0	0	1	40	1	1	100	0	1	0	31	26	18	1			100	80	30	0	0		0
6	Golden Retriever	9	MN	2022-09-26	Acute myeloid leukemia: M4	0.3	47	256.3	2.6	0	2.6	2.6	246	133	95.9813		96			VB	1	0	3	55	2	1	100	0	2	11	93	43	60	54			100	100	92	0	0		0
7	Shepherd mix	8	MN	2023-06-24	Acute myeloid leukemia: M4	0.37	23	59.5	10.7	4.2	0.6	30.9	13.1	120	22.0168					VB	60	0.5	2	2	1	1	99	1	5	96 w	99	85	82	60			9	71	0	60	24
8	Golden Retriever	9	MN	2023-05-08	Acute myeloid leukemia: M4	0.29	ND	7.3	0.1	0	1.3	0.1	5.8	37	79.4521					VB	3	1	6	63	5	5	92	1	1	3	72	3	39	23			95	99	32	0	0		0
9	Pitbull mix	8	FS	2022-01-17	Acute myeloid leukemia: M4	0.21	71.9	1.1	0.2	0	0.6	0.2	0.1	259	9.09091			87 LN		LN	62	0	0	0	0	0	100	0	0	52	94	96	94	ND			56	0	23	3	0		0
10	Lab x Hound	10	FS	2022-06-15	Acute myeloid leukemia: M4	0.19	ND	31.4	10	3.8	0.9	16.6	0	155	0			27 LN		LN	65	2	8	3	3	4	100	4	4	83	63	67	ND	ND			12	16	6	0	0		0
11	Labrador Retriever	8	MN	2016-05-07	Acute myeloid leukemia: M5	0.25	34	108.2	1.1	0	6.5	2.2	98.5	75	91.0351					VB	34	0	0	79	0	0	99	0	0	20	20	76	77	ND			11	0	0	0	ND		1
12	Golden Retriever	14	FS	2022-03-09	Acute myeloid leukemia: M5	0.46		5.8	3.5	0	1.8	0.2	0	209	0		4	47 LN		LN	12	21	32	4	43	37	96	9	9	52	27	25	30	ND			100	100	3	0	0		4
13	Pembroke Welsh Corgi	3	FS	2021-01-20	Acute myeloid leukemia: M5	0.33	ND	7.1	0.7	0.3	0.9	2.3	2.8	Low	39.4366					VB	34	1	4	20	4	5	100	1	1	30	94	28	28	ND			100	68	0	11	10		6
14	Bernese	2	FS	2015-10-30	Acute myeloid leukemia: M5	0.36	24	3.5	2.8	0	0.5	0.2	0	54	0		83			BM	1	0	11	18	0	1	100	0	0	0	2	28	0	ND			83	29	12	0	ND
15	Golden Retriever	11	MN	2015-10-15	Acute myeloid leukemia: M5	0.38	42	3.7	1.5	0	2.2	0	0	169	0		100			BM	37 w	1	0	97	0	0	100	0	0	0	74	75	8	ND			90	4	0	0	ND
16	Maltese	12	MN	2019-06-20	Acute myeloid leukemia: M5	0.21	32.7	2.9	0.8	0	2	0.1	0.1	175	3.44828		65			BM	33.63	1	1.38	51.49	0.76	0.68	97.88	0.29	1.37	56.24	87.61	54.46	38.44	ND			42	39	0	ND	ND
17	Soft-coated Wheaten Terrier	11	M	2019-02-19	Acute myeloid leukemia: M5	0.48	ND	3.1	2.2	0	0.7	0.1	0	287	0			>50 PLF, >80 mediastinal mass		PLF	12.52	0	1.97	66.31	0	0	98.64	0	0	16.45	56.93	67.87	17.38	ND			11	ND	0	ND	ND
18	German Shepherd	4	MN	2022-03-28	Acute myeloid leukemia: M5	0.23	30	294.5	0	0	2.9	2.9	288.6	67	97.9966					VB	1	0	0	22	0	0	99	0	0	2	41	3	25	ND			97	90	6	0	0		0
19	German Shepherd X	7	MN	2022-03-30	Acute myeloid leukemia: M5	0.37	14	10.8	9.8	0	0.3	0.5	0.1	289	0.925926			62 LN		LN	11	3	64	65	2	13	99	15	13	5	41	5	14	ND			100	53	0	0	0		0
20	Mixed	14	MN	2022-04-26	Acute myeloid leukemia: M5	0.32	ND	0.9	0.5	0.1	0.1	0.2	0.04	106	4.44444			86 LN		LN	1	1	3	84	0	1	100	0	1	15	56	6	30	ND			61	5	0	0	0		1
21	Cockapoo	3.5	FS	2022-10-01	Acute myeloid leukemia: M5	0.08	59	55.7	6.7	2.8	1.7	39	5.6	52	10.0539			55 LN		VB	21	0	1	1	0	1	79	0	0	85	96	80	0	95			97	15	0	8	0		0
22	Golden Retriever	6	M	2022-10-21	Acute myeloid leukemia: M5	0.28	39	35.7	0.7	0	1.1	1.1	32.5	100	91.0364					VB	7	0	2	0	1	0	94	0	0	9	89	34	ND	87			54	88	17	0	0		0
23	Golden Retriever	6	MN	2023-01-21	Acute myeloid leukemia: M5	0.38	72	4.2	1.6	0.3	0.7	0.1	1.5	72	35.7143		76			BM	7	1	6	51	4	4	78	2	2	33	40	13	35	28			99	78	4	5	0		0
24	Labrador Retriever	7	MN	2023-01-21	Acute myeloid leukemia: M5	0.2	11	65.6	1.8	0	0.4	1.8	40.4	221	61.5854					VB	0	0	1	56	0	1	74	0	1	49	79	1	81	29			35	0	4	0	0		1
25	Golden Retriever	7	FS	2023-01-24	Acute myeloid leukemia: M5	0.25	56	16	1.6	0.2	1	7.4	5.9	110	36.875					VB	32	2	6	13	5	6	62	1	0	77	82	11	79	79			93	12	0	0	0		12
26	Golden Retriever	7.5	MN	2023-02-27	Acute myeloid leukemia: M5	0.44		66.9	2	0.7	0.7	4.7	58.9	154	88.0419					VB	24	1	4	53	3	2	93	0	0	24	44	16	30	24			76	44	0	4	0		0
27	Rhodesian Ridgeback	4	M	2023-03-25	Acute myeloid leukemia: M5	0.32	ND	83.2	10.8	1.7	2.5	47.4	20.8	85	25					VB	15	0	40	35	0	0	92	0	0	80	82	68	65	12			45	100	0	0	0		0
28	Golden Retriever	2	MN	2023-07-06	Acute myeloid leukemia: M5	0.23	29	313.3	34.5	6.3	3.1	125.3	144.1	24	45.9943					VB	8	0	4	4	0	0	95	1	3	66	32	2	11	14			56	57	0	10	0		0
29	Bernadoodle	3	MN	2023-04-28	Acute myeloid leukemia: M5	0.18	ND	85.2	62.2	0	0.9	3.4	18.7	94	21.9484					VB	26	1	3	76	3	0	99	1	3	28	26	18	15	15			70	100	8	0	0		0
30	Labrador Retriever	7	FS	2021-09-10	Acute myeloid leukemia: M5	0.35	45	70.3	0.7	1.4	2.8	47.8	17.6	50	25.0356					VB	13	0	3	0	3	1	89	1	0	39	80	37	ND	ND			5	58	8	16	0		0
31	Laborador Retriever	10	MN	2019-03-28	Acute myeloid leukemia: M7	0.18	ND	12.7	0	0	1.651	0	11.049	50	87					VB	24	31	64	10	67	56	98	7	12	0	0	0	0	ND	CD61: 30		44	84	0	ND	ND
32	Golden Retriever	3	FS	2018-09-20	Acute myeloid leukemia: M7	0.16	25.3	3.3	0.6	0	2.5	0.2	0	7	0		>20			BM	0	0	20.05	0	0	3.83	93.15	0	0	8.73	34.6	0	0	ND	CD61: 81		0	100	0	ND	0
33	Pembroke Welsh Corgi	2.5	MN	2023-03-01	Acute myeloid leukemia: M7	0.18	69	3.8	1.2	0.4	1.2	0.9	0.04	44	1.05263		38			BM	14	0	31	1	3	3	94	2	2	29	44	22	3	23	CD61: 46		47	22	22	0	0		1
34	Golden Retriever	2	M	2022-08-22	Acute myeloid leukemia: M4 cytochemistry	0.32	23	14.5	2.2	0.9	6.4	0.1	4.9	151	33.7931					VB	17	3	11	75	0	0	90	0	0	2	31	1	16	7			36	88	99	0	0		0
35	Anatolian Shepherd	8	FS	2023-05-19	Acute myeloid leukemia: M5 cytochemistry	0.36	10	2.8	0.4	0	1.4	0	0.6	93	21.4286		83			BM	20	17	47	25	37	39	80	7	5	1	1	2	ND	ND			94	97	4	0	0		0
36	Laborador Retriever	8	MN	2022-10-02	Acute myeloid leukemia: M5 cytochemistry	0.34	9	3	1.7	0.1	1	0.2	0	41	0		50			BM	0	1	97	0	2	1	99	0	8	1	4	0	0	ND			11	27	0	0	0		0
37	Golden Retriever	3	MN	2023-06-14	Acute myeloid leukemia: M5 cytochemistry	0.26	ND	6.5	1	0.1	0	0.7	4.2	29	64.6154					VB	8	1	9	84	3	2	13	1	1	10	12	5	6	1			48	71	12	13	0		2
38	Golden Retriever	12	MN	2017-07-11	Acute myeloid leukemia: M5 cytochemistry	0.22	4	9.6	0.1	0	1.2	0	8.3	22	86.4583					VB	1	0	0	45	0	1	100	0	0	0	32	0	0	ND			99	13	8	0	0
39	German Shepherd	9	MN	2017-05-30	Acute myeloid leukemia: M5 cytochemistry	0.3	157	97.5	2.9	1	4.9	0	88.7	42	90.9744					VB	7	0	0	45	0	0	99	0	0	9	10	12	12	9			14	68	7	ND	0
	Median age	7.5			Reference interval	0.41-0.58	11-92	5.7-14.2	2.7-9.4	0-0.1	0.9-4.7	0.1-1.3	0	186-545							Residual cells	Residual cells	Residual cells		Residual cells	Residual cells				Residual cells	Residual cells	Residual cells	Residual cells	Residual cells
					Units	L/L	x 10^9/L	x 10^9/L	x 10^9/L	x 10^9/L	x 10^9/L	x 10^9/L	x 10^9/L	x 10^9/L	%					W: Weak expression (overlap with isotype control)
							ND: Not done													ND: Not done									Positive	15	28	17	16	10			ALP: Alkaline phosphatase
							* Only done in anemic animals													Positive	14								Number	39	39	39	35	17			ANBE: Alpha-naphthyl butyrate esterase
																				Number	39								%	0.384615	0.717949	0.435897	0.457143	0.588235			CAE: Chloroacetate esterase
																				%	0.358974					Bonferroni	0.01		Fisher exact	0.006		0.021	0.033	0.366			MPx: Myeloperoxidase
																					0.003																SBB: Sudan Black B

## Sheet: Supplementary Table 6 mixed
Supplementary Table 6: Signalment and laboratory results in 11 dogs with "mixed lineage" acute leukemia, in which testing for CD80 expression on tumor cells was performed with flow cytometric analysis. The term "mixed lineage" indicates the tumor was expressing T (CD3, CD5) or B (CD21, CD22) cell markers and myeloid antigens on flow cytometric analysis (myeloid antigens) or had cytochemical stain…
Bolded values in the hemogram: Results outside the reference intervals; In flow cytometry: Results above designated cut-offs for positive cells (CD34, myeloid markers in lymph nodes: >=5%, remaining markers and samples: >=20% for all markers), red values indicate discrepant results between CD3 and CD5 or CD21 and CD22
					Select hemogram results											Other cytologic results			Flow cytometric results (percentage positive cells in tumor gate)																Cytochemical results (percentage positive blasts)						Other testing
Dog	Breed	Age	Gender	Diagnosis	Hematocrit	Absolute reticulocyte count*	White blood cell count	Mature neutrophils	Immature neutrophils	Lymphocytes	Monocytes	Blasts	Platelets	Blast percentage		Bone marrow blast percentage	Lymph node blast percentage		Source	CD4	CD8	MHCII	CD34	CD3	CD5	CD45	CD21	CD22	CD14	CD80	CD11b	CD11c	CD18		ALP	ANBE	CAE	SBB	MPx		CD3 immunocytochemical staining (percentage positive)	Histology, clonality
1	Labrador Retriever	4	MN	"Mixed lineage" leukemia: CD3+/ myeloid antigens	0.26	31	63	24.6	3.8	9.4	3.2	20.8	41	33.0159		>80			VB	42	0	23	6	46 w	2	98	0	0	71	87	71	84	ND		16	100	0	7	ND
2	Labrador Retriever	10	MN	"Mixed lineage" leukemia: CD3+/myeloid antigens	0.22	60	47.6	1.4	0	0	2.9	43.3	48	90.9664		>80			VB	23	0	0	36	83 w	0	100	0	0	25	59	72	43	ND		59	20	0	ND	0
3	Cavalier King Charles Spaniel	6	FS	"Mixed lineage" leukemia: CD5+/myeloid antigens	0.4	19	227.6	4.6	2.3	9.1	0	211.7	108	93.0141					VB	0	0	0	37	0	33 w	100	0	0	0	13	88	12	ND		100	54	4	ND	0
4	Rottweiler	9	F	"Mixed lineage" leukemia: CD22+/myeloid antigens	0.39	13	52.6	1.1	0	2.6	0	48.9	20	92.9658		>80			BM	0	0	0	95	0	0	100	0	71 w	0	0	85	16	ND		100	96	21	0	0
5	Laborador Retriever	10	FS	"Mixed lineage" leukemia: CD3+/CD5+/CD22+/myeloid antigens	0.24	98	78.4	16.4	6.3	11	6.3	30.5	55	38.9031			87		LN	54	0	0	0	73 w	57 w	100	0	70 w	11	62	67	33	ND		15	10	6	0	0
6	Swiss Mountain Dog	3	M	"Mixed lineage" leukemia: CD3+/cytochemistry	0.12	32	97.6	0	0	9.8	0	87.8	79	89.959					VB	1	1	1	91	75	5	98	0	0	0	0	0	ND	ND		98	65	4	0	0		0
7	Mixed	7	FS	"Mixed lineage" leukemia: CD5+/cytochemistry	0.42		13.7	0.1	0	1.5	0	12.1	37	88.3212		>80			VB	0	0	36	94	0	77 w	98	0	0	0	0	0	0	ND		62	82	0	0	ND
8	Bernese Mountain Dog	3	M	"Mixed lineage" leukemia: CD5+/cytochemistry	0.33	ND	93.5	1.9	1.9	4.7	0	85.1	33	91.016					VB	1	0	2	98	1	88	99	0	0	0	1	1	1	ND		37	28	0	11	4		67
9	Yorkshire Terrier	10	MN	"Mixed lineage" leukemia: CD5+/cytochemistry	0.27	45	184.4	1.8	1.8	0	47.9	132.7	62	71.9631		>80			VB	35	0	2	28	1	61	99	0	0	35	38	8	14	0		92	22	0	0	0		0
10	Golden Retriever	9	FS	"Mixed lineage" leukemia: CD3+/C5+/cytochemistry	0.3	ND	143	0	0	5.7	0	137.3	119	96.014					VB	1	0	1	96	23 w	50 w	100	0.2	0.2	0	0	0	0	26		16	100	3	0	0		10
11	Labradoodle	8	FS	"Mixed lineage" leukemia: CD22+/cytochemistry	0.25	ND	2.3	1.2	0	0.8	0.1	0.3	264	13.0435			81		LN	0	0	1	97	1	0	100	0	77 w	1	44	3	ND	ND		89	97	42	0	0		10
	Median age	8		Reference interval	0.41-0.58	11-92	5.7-14.2	2.7-9.4	0-0.1	0.9-4.7	0.1-1.3	0	186-545						W: Weak expression (overlap with isotype control)	Residual cells									Residual cells	Residual cells		Residual cells			ALP: Alkaline phosphatase
				Units	L/L	x 10^9/L	x 10^9/L	x 10^9/L	x 10^9/L	x 10^9/L	x 10^9/L	x 10^9/L	x 10^9/L	%					ND: Not done											* >5% CD34+ were CD80+					ANBE: Alpha-naphthyl butyrate esterase
						ND: Not done													Positive	3								Positive	3	4	5	3	1		CAE: Chloroacetate esterase
						* Only done in anemic animals													Number	11								Number	11	11	11	9	2		MPx: Myeloperoxidase
																			Percentage	0.272727								Percentage	0.272727	0.363636	0.454545	0.333333	0.5		SBB: Sudan Black B
